# Supplementary material
Source: publisher site journal article supplement (https://www.dovepress.com/get_supplementary_file.php?f=314882.docx)
Supplement: Supplementary file 1 [file get_supplementary_file.php]

**
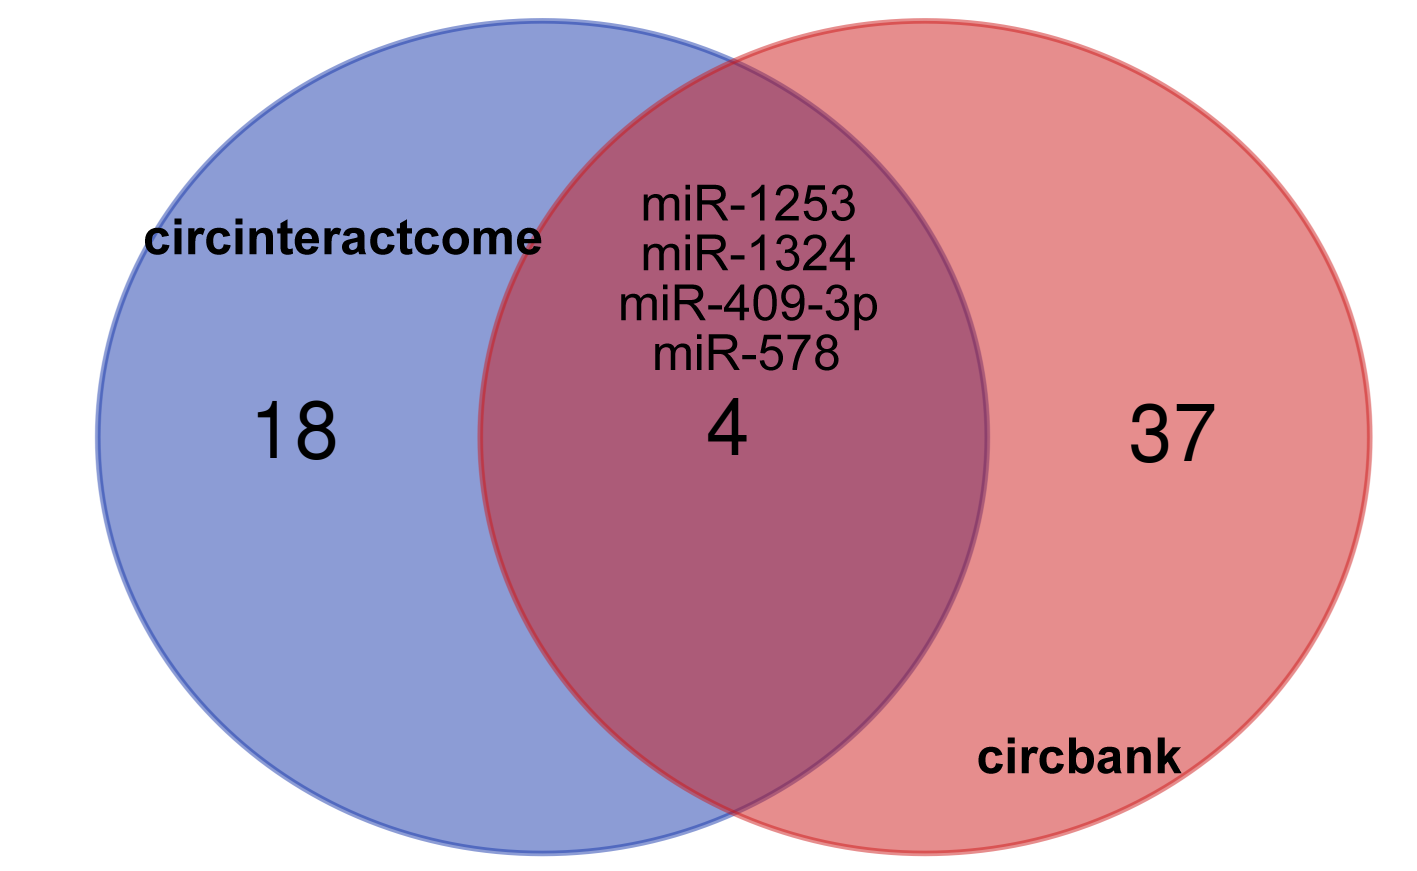
**

Figure S1. Venn diagram showing the miRNAs intersection of circbank and circinteractome, which predicted the binding of circ_0014715.
